# Supplementary material for: Physiological traits of endornavirus-infected and endornavirus-free common bean (Phaseolus vulgaris) cv Black Turtle Soup
Source: Springer Nature journal article supplement (doi:10.1007/s00705-018-3702-4), 2018-01-06
Supplement: MOESM7 [file 15347806]

**Supplementary Table 4** Double-antibody sandwich ELISA readings of SHMV-infected primary and trifoliate leaves of BTS- 4 and BTS+ 3 lines

| **Lines** | **Type of leaf** | **Days after inoculation** | **OD (405 nm)** |
| --- | --- | --- | --- |
| BTS+ 3 | Primary | 7 | 0.87±0.23 ab* |
|  | 14 | 1.01±0.11 ab |
| Trifoliate | 7 | 0.98±0.14 ab |
|  | 14 | 1.04±0.29 ab |
| BTS- 4 | Primary | 7 | 0.76±0.12 b |
|  | 14 | 0.98±0.12 ab |
| Trifoliate | 7 | 0.90±0.10 ab |
|  | 14 | 1.09±0.34 a |

*Mean values followed by the same letter of the same column do not differ significantly according to the LSD test (p<0.05). ±= Standard deviation
